# Supplementary material for: Romanian Maize (Zea mays) Inbred Lines as a Source of Genetic Diversity in SE Europe, and Their Potential in Future Breeding Efforts
Source: PLoS One. 2013 Dec 31;8(12):e85501. doi: 10.1371/journal.pone.0085501 (PMC3877385; doi:10.1371/journal.pone.0085501)
Supplement: Table S1 — Morphological, physiological, and biochemical descriptors used in characterizing the 90 inbred lines. All inbred lines (90) in the first column have been characterized by various descriptors, presented in the 23 numbered columns: #1 classifies the inbred lines according to their origin in Local (from Romanian local populations), Int. standard (8 lines of European or North American origin) used as reference, and Rep. inbred (representative inbred lines of Romania, currently being used in breeding programs nationwide); #2 to #5 present the plant morphology in terms of height, insertion height of the main ear, number of leaves per plant and percentage of plant without an ear (i.e., sterile); #6 to #10 describe ear morphology; #11 presents the sum of physiologically active temperatures (that are in the range of 10 - 30 °C) needed to flower, whereas #12 is the sum needed to reach maturity; #13 is percentage of plants that were attacked by Ostrinia nubilalis; #14 to #17 represent percentages of each important component of maize kernel (i.e., proteins, fat, starch, fiber); #18 to #23 are the scores of each inbred when the gel image was analyzed (since the 27-kDa band was the most variable, its intensity was scored from 1 to 4, the last being the most intense. The other five bands were scored from 1 to 3; values of 0 mean that the band was missing in that inbred lines). (XLS) [file pone.0085501.s005.xls]

## Sheet: Table S1
		1	2	3	4	5	6	7	8	9	10	11	12	13	14	15	16	17	18	19	20	21	22	23
	Inbred line	Type	Plant morphology				Ear morphology					Physiology			Kernel content				Intensity of zein bands
			Height (cm)	Insertion (cm)	Leaves (no.)	Sterility (%)	Length (cm)	Kernel efficiency(%)	Weight of 1000 k (g)	Kernel type	Cob colour	Flowering (∑ oC)	Maturity (∑ oC)	Attacked by O.n. (%)	Proteins (%)	Fat (%)	Starch (%)	Fibre (%)	27-kDa	22-kDa	19-kDa	16-kDa	15-kDa	10-kDa
1	T20	Local	143	51	11	22	12.1	77	144	Semi-dent	White	571	1062	59	13.3	4.8	65.6	4.8	3	2	2	2	2	1
2	T21	Local	139	54	12	10	12.2	73	153	Semi-dent	White	628	985	100	14.5	4.2	66.1	5.4	1	1	1	2	1	1
3	T22	Local	143	46	13	21	15.6	80	215	Flint	Dark red	571	1005	53	13.6	5.3	63.1	4.9	2	1	2	2	2	1
4	T23	Local	200	60	13	53	14.1	84	171	Flint	White	571	970	65	11.9	4.3	68.6	2.9	3	2	2	2	1	1
5	T139	Local	128	46	12	7	11.1	73	122	Flint	White	613	1031	93	17.7	4.4	63.3	7.1	2	3	2	3	2	3
6	T141	Local	167	74	13	15	16	69	270	Dent	Red	558	985	55	13.6	5.2	63.5	5	4	2	2	2	2	2
7	T145	Local	137	45	11	32	11.6	79	194	Flint	White	628	1075	75	13.9	4.4	66.9	5.4	3	2	3	2	2	2
8	T146	Local	142	51	11	6	12	76	114	Flint	White	657	1075	44	14.6	4.9	62.8	4.2	4	3	3	2	2	2
9	T147	Local	104	26	11	29	10.6	81	119	Flint	White	583	1051	71	12.6	2.3	70	0.5	3	3	3	2	3	2
10	T148	Local	78	23	9	38	11	71	103	Flint	White	628	1030	17	12.5	5	65.5	3.9	4	3	3	2	3	3
11	T155	Local	140	52	13	6	13.8	69	219	Semi-flint	White	533	970	54	12.2	4.8	66.8	3.2	1	2	3	1	2	0
12	T157	Local	153	68	13	18	13.7	85	227	Semi-dent	Dark red	597	1075	44	11	4.8	68	2.7	3	1	1	2	2	0
13	T162	Local	152	38	12	21	14.9	84	229	Flint	White	571	1031	6	13.4	4.2	65.2	3.9	3	1	2	2	2	1
14	T164	Local	155	73	14	0	14	-	170	Flint	White	628	985	94	14.3	4.7	65.9	5.7	2	1	2	2	2	3
15	T172	Local	144	62	12	56	14.2	72	218	Semi-dent	Red	730	1085	56	14	4.4	66.6	5.1	4	3	2	1	1	2
16	T250	Local	170	81	14	75	10	68	176	Flint	White	683	1075	66	14.5	4.5	64.4	3.5	2	3	3	2	3	2
17	T251	Local	192	53	14	46	12.9	81	191	Flint	White	643	925	84	13.1	3.4	69.7	3.9	4	1	1	2	2	2
18	T280	Local	120	45	12	37	16.7	73	182	Semi-flint	Red	697	1097	54	12.3	3	70.9	2.4	4	3	3	1	2	2
19	T290	Local	148	46	13	24	18	67	191	Dent	White	597	985	73	13.9	5.3	65.5	6.2	2	2	3	3	3	2
20	T291	Local	164	73	14	3	14.6	78	296	Semi-dent	Dark red	583	925	64	11.5	3.5	70.7	2.3	1	1	2	2	2	3
21	T381	Local	159	67	14	59	13	80	144	Flint	White	669	1209	77	16.7	5.5	59.2	5.7	4	3	3	2	3	3
22	T382	Local	141	51	14	45	13.9	84	360	Semi-flint	Red	643	1023	88	12.9	3.4	67.9	2.1	3	3	3	3	3	3
23	TA307	Local	139	41	11	35	13.5	-	270	Dent	Red	628	1031	45	11.8	4.1	68.3	2.8	4	2	2	2	2	3
24	TB330	Local	179	87	12	73	13.4	71	266	Flint	White	683	1131	63	13.1	3.2	67.5	1.8	4	3	2	2	2	2
25	TB381	Local	172	61	13	9	16	76	236	Flint	White	613	985	72	14.1	4.3	64.3	3	3	2	3	2	3	3
26	T433	Local	217	91	15	9	14	83	206	Semi-flint	Dark red	724	1131	52	16.2	5.1	62	6	3	3	3	3	2	2
27	T143	Local	70	15	25	81	14.2	83	225	Flint	White	1075	189	67	12.3	4.4	68	4.4	2	2	2	1	3	3
28	T158	Local	176	60	14	75	18.5	72	254	Semi-dent	Red	643	941	61	14.5	4.4	67.1	6	1	1	3	1	1	1
29	T168	Local	116	44	13	13	13.2	76	229	Semi-flint	White	612	1062	53	13.3	4.3	67.2	4.3	1	3	3	2	3	2
30	T169a	Local	152	54	12	3	15	72	249	Semi-flint	White	583	1014	67	10.3	3.7	72.1	1.9	3	2	3	2	2	2
31	T186	Local	124	36	12	10	14	58	205	Flint	White	597	955	84	14.2	2.9	67.7	3.6	4	3	3	2	1	1
32	T235	Local	205	62	16	50	15.5	70	200	Dent	Red	649	1040	76	13.4	3.9	69	5	1	2	3	2	2	3
33	TC221	Local	181	65	14	7	18.3	85	210	Flint	White	643	1051	64	15.4	6.7	58.6	6.5	3	2	3	2	2	3
34	TC248	Local	178	55	15	28	17	69	127	Flint	White	613	1040	61	14.9	4.7	60	3.1	3	3	2	3	3	3
35	TA309A	Local	161	52	14	31	13.5	-	220	Dent	White	628	1031	78	13.7	6.1	62.5	5.7	3	2	2	1	2	2
36	TA310A	Local	158	53	12	19	12	71	190	Flint	Dark red	628	1014	83	12.9	3.7	67.7	2.7	4	3	2	2	2	0
37	TA308	Local	128	31	10	25	13.5	-	230	Dent	Red	628	1031	55	12.3	4	69.5	3.3	3	2	3	2	3	3
38	TA398	Local	154	60	12	79	14	73	172	Semi-dent	White	683	1121	63	14.3	3	67.2	3	2	1	2	3	3	3
39	TC336	Local	158	56	11	3	16	73	155	Flint	White	597	1107	97	14.3	4.6	62	3.8	1	2	2	3	2	2
40	T442	Local	208	81	15	11	15	84	190	Flint	White	683	1137	13	16.8	5	62.1	6.5	4	3	3	1	1	1
41	TA408	Local	199	63	17	0	13	76	234	Semi-dent	Dark red	697	1195	70	13.8	4.8	67.7	6.4	2	1	3	2	2	2
42	RF7	Local	189	60	12	26	12	83	211	Semi-dent	White	798	1314.5	65	12.2	4.2	66.5	2.4	4	3	3	3	3	2
43	F43	Local	184	67	12	0	14	78	226	Semi-flint	Dark red	821	1314.5	80	13.2	3.3	68.9	4.1	2	2	3	3	2	0
44	Bucovina66	Local	133	66	12	9	12.5	80	180	Semi-flint	White	714	1178.6	91	12.5	3.7	68.6	2.9	4	3	3	2	2	3
45	LV37	Local	179	48	15	16	13	77	293	Semi-flint	Red	799	1316	37	11.8	3.9	70.4	3	2	3	3	2	2	2
46	LV51	Local	189	63	13	23	15.3	68	349	Semi-flint	Red	877	1275	66	12.6	3.8	67.7	2.9	2	2	3	3	3	3
47	PI187	Local	164	40	12	18	12	81	103	Flint	White	714	1109	96	14.2	4.1	65.6	3.1	3	3	3	3	3	3
48	B73	Int. standard	174	73	15	7	12.5	79	203	Semi-dent	White	852	1354	82	12.7	4.7	69.2	5.6	3	2	3	3	3	3
49	MO17	Int. standard	178	69	15	3	14.8	81	171	Semi-dent	White	866	1413	75	12.5	4.5	70.1	5.8	4	2	3	1	1	1
50	OH43	Int. standard	210	13	16	13	15.3	82	343	Dent	White	834	1413	49	14	4	70.9	6.2	1	1	2	1	2	0
51	FV2	Int. standard	168	8	11	0	12.7	79	251	Flint	White	661	1109	63	14.5	3.6	68.2	4.2	4	2	2	1	2	2
52	W153	Int. standard	155	5	14	0	13.8	85	295	Semi-flint	Red	730	1163	72	12.8	4.7	68.2	4.9	3	3	3	2	3	3
53	C103	Int. standard	181	16	14	19	18.5	81	250	Dent	Red	892	1422	32	13.5	4.8	68.5	5.7	2	3	2	2	2	0
54	Lo3	Int. standard	213	71	12	3	18.4	77	208	Flint	White	799	1275	72	14.5	3.3	68.3	2.6	3	2	3	3	3	3
73	D105	Int. standard	167	67	11	8	12	-	210	Flint	White	757	1179	84	12.4	4.3	66.9	3.5	3	2	2	2	2	0
55	TB329	Rep. inbred	192	77	12	0	13.4	82	220	Dent	Dark red	821	1354	75	12.3	3.4	69.7	3.2	2	3	3	2	2	0
56	TC177	Rep. inbred	129	37	10	4	14.8	77	204	Flint	White	547	1163	56	13	3.5	66.5	1.8	4	2	2	1	2	1
57	TC344	Rep. inbred	185	62	13	19	18	73	262	Semi-dent	Red	783	1213	75	12.6	6.2	65.1	5.9	4	2	2	2	3	0
58	F1852	Rep. inbred	146	49	14	6	17.3	81	293	Semi-dent	Red	714	1101	100	11	4	68.5	3.8	4	1	3	3	3	0
59	TD233	Rep. inbred	163	55	12	0	15	76	294	Flint	Dark red	628	1075	68	11.4	4.4	68.3	2.4	2	2	3	3	3	0
60	TD234	Rep. inbred	164	48	12	0	12.6	85	260	Flint	Red	571	1107	82	12.9	3.8	68	3.8	2	2	3	2	2	0
61	TD235	Rep. inbred	142	48	12	9	11.2	81	300	Flint	Red	583	1107	64	13.7	3.5	68.9	4.7	2	3	3	2	2	2
62	TD236	Rep. inbred	149	53	12	0	10.9	85	283	Flint	Red	583	1107	63	11	3.5	71.3	2	4	2	2	2	2	1
63	TD237	Rep. inbred	148	47	12	18	15	62	289	Flint	Dark red	628	1161	79	13.3	2.9	69.6	3.8	3	3	3	3	3	3
64	TD238	Rep. inbred	142	40	11	5	15	76	296	Semi-flint	Dark red	613	1112	60	13.1	3.5	69.4	4.7	3	3	3	3	3	2
65	TD239	Rep. inbred	144	39	11	4	14	84	281	Flint	Red	583	1097	68	13.3	3.4	68.5	4	1	2	3	3	2	2
66	T248	Rep. inbred	165	48	12	55	18	81	161	Dent	Red	669	1121	45	14.3	5.1	66.1	6.5	4	3	3	3	3	3
67	T243	Rep. inbred	132	52	12	85	11.7	72	153	Semi-flint	Red	683	1121	35	14.3	4.1	67.1	4.6	4	2	3	1	1	0
68	N4	Rep. inbred	140	51	14	7	11.4	79	216	Semi-flint	Dark red	852	1250	91	13.8	5.9	60.9	5.1	1	3	3	3	3	2
69	TC208	Rep. inbred	171	63	13	6	14.8	72	278	Dent	White	583	1062	41	10.3	5.3	67.4	2.7	3	3	3	3	3	0
70	TC209	Rep. inbred	146	48	12	67	14.5	82	195	Semi-dent	Red	583	996	67	10	4.4	71.2	2.5	2	2	1	3	3	3
71	TC243	Rep. inbred	150	42	12	11	14	82	132	Dent	White	583	1097	72	13.1	4.9	65	3.5	3	2	3	2	3	3
72	TB367	Rep. inbred	139	43	13	28	17	79	171	Flint	Red	657	1131	65	10.5	4.9	66.2	2.9	4	3	3	3	3	3
74	TC385A	Rep. inbred	200	34	13	13	21	80	322	Semi-dent	White	583	1112	72	12.2	3.9	68.3	3	4	2	3	1	1	1
75	TC384A	Rep. inbred	166	66	12	6	16.9	82	309	Semi-dent	Red	613	1126	97	13	2.8	70.2	2.7	2	3	3	3	3	0
76	TC398	Rep. inbred	149	43	14	0	21	79	242	Semi-dent	Red	643	1131	57	13.8	3.5	68.6	4.8	3	3	1	3	2	0
77	TC399	Rep. inbred	197	61	12	3	18.7	75	301	Dent	White	643	1112	77	12.4	3.5	69.6	4.4	2	2	3	2	2	2
78	TD337	Rep. inbred	148	47	12	0	18	81	237	Dent	Red	628	1161	42	13.4	3.8	66.8	4.3	3	3	3	3	3	2
79	TA426	Rep. inbred	189	58	13	9	16	94	281	Semi-dent	Red	643	1112	72	12.8	4	67.1	3.8	3	2	2	2	3	3
80	TA428	Rep. inbred	179	61	13	6	13	83	196	Semi-dent	Red	628	1112	88	13.7	3.9	67.8	4.9	3	2	3	2	3	3
81	TA422	Rep. inbred	198	67	13	0	17	81	237	Semi-flint	Dark red	683	1086	50	12.6	3.3	69.2	2.6	2	1	2	1	3	2
82	TE356B	Rep. inbred	177	75	12	0	14.6	87	199	Semi-dent	Red	597	1086	41	11.4	4.7	68.1	3.5	1	2	3	2	2	2
83	TE357	Rep. inbred	170	71	13	6	12.7	88	248	Dent	Red	643	1107	58	11.1	4.9	69.7	4.1	3	3	3	3	3	2
84	P1932	Rep. inbred	157	56	13	0	14.9	72	274	Semi-flint	White	714	1101	76	12.4	3.5	67.6	3	4	2	2	2	1	1
85	TC109A	Rep. inbred	146	40	11	41	17	71	255	Flint	Dark red	589	1014	46	11.7	4.8	69.1	4.3	4	2	2	2	2	1
86	TD268	Rep. inbred	155	52	14	23	16.7	67	194	Dent	White	643	1176	49	13	4.1	68.6	5.3	3	2	2	3	3	0
87	CO255	Rep. inbred	207	64	12	0	15.4	85	195	Flint	Red	700	1095	78	13.1	3.9	69.2	4	3	3	3	3	3	3
88	TE202B	Rep. inbred	153	38	12	42	15.2	75	251	Semi-flint	White	643	1107	51	12.8	2.9	70.7	2.6	4	3	2	3	2	2
89	TE229	Rep. inbred	183	70	13	0	14	73	296	Semi-dent	Dark red	700	1213	71	13.8	2.6	69.4	3.6	3	3	3	2	2	1
90	K1080	Rep. inbred	206	85	14	0	14.7	81	238	Semi-flint	Red	739	1275	65	13.2	4.2	65	4.7	3	3	3	3	3	0
